# Supplementary material for: Placental stem cells-derived exosomes stimulate cutaneous wound regeneration via engrailed-1 inhibition
Source: Front Bioeng Biotechnol. 2022 Dec 9;10:1044773. doi: 10.3389/fbioe.2022.1044773 (PMC9780460; doi:10.3389/fbioe.2022.1044773)
Supplement: Supplementary file 3 [file Table1.XLSX]

## Sheet: Figure 1C
Size /nm	Particles /ml
0.5	0
1.5	0
2.5	0
3.5	0
4.5	0
5.5	0
6.5	0
7.5	0
8.5	0
9.5	0
10.5	0
11.5	0
12.5	0
13.5	0
14.5	0
15.5	0
16.5	0
17.5	0
18.5	0
19.5	0
20.5	0
21.5	0
22.5	0
23.5	0
24.5	0
25.5	0
26.5	0
27.5	0
28.5	0
29.5	0
30.5	0
31.5	0
32.5	0
33.5	0
34.5	0
35.5	0
36.5	0
37.5	0
38.5	0
39.5	0
40.5	0
41.5	0
42.5	0
43.5	0
44.5	0
45.5	1
46.5	2
47.5	4
48.5	8
49.5	14
50.5	24
51.5	41
52.5	68
53.5	111
54.5	177
55.5	277
56.5	426
57.5	641
58.5	948
59.5	1380
60.5	1975
61.5	2784
62.5	3867
63.5	5296
64.5	7157
65.5	9549
66.5	12588
67.5	16406
68.5	21154
69.5	27004
70.5	34151
71.5	42814
72.5	53241
73.5	65709
74.5	80526
75.5	98028
76.5	118575
77.5	142540
78.5	170295
79.5	202190
80.5	238525
81.5	279517
82.5	325266
83.5	375717
84.5	430632
85.5	489566
86.5	551866
87.5	616675
88.5	682967
89.5	749595
90.5	815350
91.5	879034
92.5	939522
93.5	995829
94.5	1047146
95.5	1092878
96.5	1132643
97.5	1166271
98.5	1193778
99.5	1215336
100.5	1231239
101.5	1241870
102.5	1247667
103.5	1249098
104.5	1246640
105.5	1240766
106.5	1231935
107.5	1220585
108.5	1207133
109.5	1191970
110.5	1175464
111.5	1157957
112.5	1139764
113.5	1121177
114.5	1102454
115.5	1083828
116.5	1065496
117.5	1047626
118.5	1030351
119.5	1013769
120.5	997950
121.5	982930
122.5	968717
123.5	955296
124.5	942629
125.5	930660
126.5	919320
127.5	908533
128.5	898216
129.5	888288
130.5	878669
131.5	869287
132.5	860081
133.5	851000
134.5	842008
135.5	833082
136.5	824213
137.5	815407
138.5	806681
139.5	798063
140.5	789588
141.5	781300
142.5	773247
143.5	765475
144.5	758035
145.5	750972
146.5	744329
147.5	738143
148.5	732446
149.5	727261
150.5	722608
151.5	718497
152.5	714930
153.5	711905
154.5	709412
155.5	707438
156.5	705962
157.5	704960
158.5	704407
159.5	704274
160.5	701581
161.5	691622
162.5	681385
163.5	670888
164.5	660149
165.5	649187
166.5	638023
167.5	626677
168.5	615166
169.5	603513
170.5	591735
171.5	579854
172.5	567886
173.5	555853
174.5	543771
175.5	531660
176.5	519536
177.5	507418
178.5	495323
179.5	483267
180.5	471265
181.5	459334
182.5	447489
183.5	435745
184.5	424115
185.5	412613
186.5	401252
187.5	390045
188.5	379003
189.5	368138
190.5	357460
191.5	346980
192.5	336706
193.5	326647
194.5	316811
195.5	307205
196.5	297836
197.5	288708
198.5	279827
199.5	271197
200.5	262822
201.5	254702
202.5	246841
203.5	239240
204.5	231899
205.5	224818
206.5	217995
207.5	211430
208.5	205121
209.5	199064
210.5	193258
211.5	187698
212.5	182381
213.5	177303
214.5	172459
215.5	167844
216.5	163454
217.5	159284
218.5	155329
219.5	151582
220.5	148040
221.5	144696
222.5	141545
223.5	138583
224.5	135803
225.5	133200
226.5	130770
227.5	128507
228.5	126407
229.5	124465
230.5	122676
231.5	121037
232.5	119542
233.5	118188
234.5	116971
235.5	115887
236.5	114933
237.5	114105
238.5	113401
239.5	112817
240.5	112350
241.5	111998
242.5	111758
243.5	111627
244.5	111604
245.5	111486
246.5	107003
247.5	102530
248.5	98079
249.5	93665
250.5	89299
251.5	84994
252.5	80761
253.5	76609
254.5	72549
255.5	68589
256.5	64737
257.5	60999
258.5	57382
259.5	53890
260.5	50528
261.5	47298
262.5	44204
263.5	41245
264.5	38423
265.5	35738
266.5	33189
267.5	30775
268.5	28493
269.5	26341
270.5	24316
271.5	22414
272.5	20632
273.5	18965
274.5	17409
275.5	15959
276.5	14612
277.5	13361
278.5	12202
279.5	11131
280.5	10142
281.5	9230
282.5	8392
283.5	7622
284.5	6915
285.5	6269
286.5	5677
287.5	5137
288.5	4645
289.5	4197
290.5	3789
291.5	3419
292.5	3083
293.5	2779
294.5	2503
295.5	2254
296.5	2029
297.5	1826
298.5	1643
299.5	1478
300.5	1329
301.5	1195
302.5	1075
303.5	967
304.5	870
305.5	783
306.5	705
307.5	634
308.5	571
309.5	515
310.5	464
311.5	419
312.5	378
313.5	342
314.5	309
315.5	280
316.5	254
317.5	230
318.5	209
319.5	190
320.5	173
321.5	157
322.5	144
323.5	131
324.5	120
325.5	110
326.5	101
327.5	93
328.5	86
329.5	79
330.5	73
331.5	68
332.5	63
333.5	59
334.5	55
335.5	51
336.5	48
337.5	45
338.5	42
339.5	40
340.5	38
341.5	36
342.5	34
343.5	32
344.5	31
345.5	29
346.5	28
347.5	27
348.5	26
349.5	25
350.5	24
351.5	24
352.5	23
353.5	22
354.5	22
355.5	22
356.5	21
357.5	21
358.5	21
359.5	20
360.5	20
361.5	20
362.5	20
363.5	20
364.5	20
365.5	20
366.5	20
367.5	20
368.5	19
369.5	17
370.5	15
371.5	14
372.5	13
373.5	12
374.5	11
375.5	10
376.5	9
377.5	8
378.5	7
379.5	7
380.5	6
381.5	5
382.5	5
383.5	4
384.5	4
385.5	4
386.5	3
387.5	3
388.5	3
389.5	2
390.5	2
391.5	2
392.5	2
393.5	2
394.5	1
395.5	1
396.5	1
397.5	0
398.5	0
399.5	0
400.5	0
401.5	0
402.5	0
403.5	0
404.5	0
405.5	0
406.5	0
407.5	0
408.5	0
409.5	0
410.5	0
411.5	0
412.5	0
413.5	0
414.5	0
415.5	0
416.5	0
417.5	0
418.5	0
419.5	0
420.5	0
421.5	0
422.5	0
423.5	0
424.5	0
425.5	0
426.5	0
427.5	0
428.5	0
429.5	0
430.5	0
431.5	0
432.5	0
433.5	0
434.5	0
435.5	0
436.5	0
437.5	0
438.5	0
439.5	0
440.5	0
441.5	0
442.5	0
443.5	0
444.5	0
445.5	0
446.5	0
447.5	0
448.5	0
449.5	0
450.5	0
451.5	0
452.5	0
453.5	0
454.5	0
455.5	0
456.5	0
457.5	0
458.5	0
459.5	0
460.5	0
461.5	0
462.5	0
463.5	0
464.5	0
465.5	0
466.5	0
467.5	0
468.5	0
469.5	0
470.5	0
471.5	0
472.5	0
473.5	0
474.5	0
475.5	0
476.5	0
477.5	0
478.5	0
479.5	0
480.5	0
481.5	0
482.5	0
483.5	0
484.5	0
485.5	0
486.5	0
487.5	0
488.5	0
489.5	0
490.5	0
491.5	0
492.5	0
493.5	0
494.5	0
495.5	0
496.5	0
497.5	0
498.5	0
499.5	0
500.5	0
501.5	0
502.5	0
503.5	0
504.5	0
505.5	0
506.5	0
507.5	0
508.5	0
509.5	0
510.5	0
511.5	0
512.5	0
513.5	0
514.5	0
515.5	0
516.5	0
517.5	0
518.5	0
519.5	0
520.5	0
521.5	0
522.5	0
523.5	0
524.5	0
525.5	0
526.5	0
527.5	0
528.5	0
529.5	0
530.5	0
531.5	0
532.5	0
533.5	0
534.5	0
535.5	0
536.5	0
537.5	0
538.5	0
539.5	0
540.5	0
541.5	0
542.5	0
543.5	0
544.5	0
545.5	0
546.5	0
547.5	0
548.5	0
549.5	0
550.5	0
551.5	0
552.5	0
553.5	0
554.5	0
555.5	0
556.5	0
557.5	0
558.5	0
559.5	0
560.5	0
561.5	0
562.5	0
563.5	0
564.5	0
565.5	0
566.5	0
567.5	0
568.5	0
569.5	0
570.5	0
571.5	0
572.5	0
573.5	0
574.5	0
575.5	0
576.5	0
577.5	0
578.5	0
579.5	0
580.5	0
581.5	0
582.5	0
583.5	0
584.5	0
585.5	0
586.5	0
587.5	0
588.5	0
589.5	0
590.5	0
591.5	0
592.5	0
593.5	0
594.5	0
595.5	0
596.5	0
597.5	0
598.5	0
599.5	0
600.5	0
601.5	0
602.5	0
603.5	0
604.5	0
605.5	0
606.5	0
607.5	0
608.5	0
609.5	0
610.5	0
611.5	0
612.5	0
613.5	0
614.5	0
615.5	0
616.5	0
617.5	0
618.5	0
619.5	0
620.5	0
621.5	0
622.5	0
623.5	0
624.5	0
625.5	0
626.5	0
627.5	0
628.5	0
629.5	0
630.5	0
631.5	0
632.5	0
633.5	0
634.5	0
635.5	0
636.5	0
637.5	0
638.5	0
639.5	0
640.5	0
641.5	0
642.5	0
643.5	0
644.5	0
645.5	0
646.5	0
647.5	0
648.5	0
649.5	0
650.5	0
651.5	0
652.5	0
653.5	0
654.5	0
655.5	0
656.5	0
657.5	0
658.5	0
659.5	0
660.5	0
661.5	0
662.5	0
663.5	0
664.5	0
665.5	0
666.5	0
667.5	0
668.5	0
669.5	0
670.5	0
671.5	0
672.5	0
673.5	0
674.5	0
675.5	0
676.5	0
677.5	0
678.5	0
679.5	0
680.5	0
681.5	0
682.5	0
683.5	0
684.5	0
685.5	0
686.5	0
687.5	0
688.5	0
689.5	0
690.5	0
691.5	0
692.5	0
693.5	0
694.5	0
695.5	0
696.5	0
697.5	0
698.5	0
699.5	0
700.5	0
701.5	0
702.5	0
703.5	0
704.5	0
705.5	0
706.5	0
707.5	0
708.5	0
709.5	0
710.5	0
711.5	0
712.5	0
713.5	0
714.5	0
715.5	0
716.5	0
717.5	0
718.5	0
719.5	0
720.5	0
721.5	0
722.5	0
723.5	0
724.5	0
725.5	0
726.5	0
727.5	0
728.5	0
729.5	0
730.5	0
731.5	0
732.5	0
733.5	0
734.5	0
735.5	0
736.5	0
737.5	0
738.5	0
739.5	0
740.5	0
741.5	0
742.5	0
743.5	0
744.5	0
745.5	0
746.5	0
747.5	0
748.5	0
749.5	0
750.5	0
751.5	0
752.5	0
753.5	0
754.5	0
755.5	0
756.5	0
757.5	0
758.5	0
759.5	0
760.5	0
761.5	0
762.5	0
763.5	0
764.5	0
765.5	0
766.5	0
767.5	0
768.5	0
769.5	0
770.5	0
771.5	0
772.5	0
773.5	0
774.5	0
775.5	0
776.5	0
777.5	0
778.5	0
779.5	0
780.5	0
781.5	0
782.5	0
783.5	0
784.5	0
785.5	0
786.5	0
787.5	0
788.5	0
789.5	0
790.5	0
791.5	0
792.5	0
793.5	0
794.5	0
795.5	0
796.5	0
797.5	0
798.5	0
799.5	0
800.5	0
801.5	0
802.5	0
803.5	0
804.5	0
805.5	0
806.5	0
807.5	0
808.5	0
809.5	0
810.5	0
811.5	0
812.5	0
813.5	0
814.5	0
815.5	0
816.5	0
817.5	0
818.5	0
819.5	0
820.5	0
821.5	0
822.5	0
823.5	0
824.5	0
825.5	0
826.5	0
827.5	0
828.5	0
829.5	0
830.5	0
831.5	0
832.5	0
833.5	0
834.5	0
835.5	0
836.5	0
837.5	0
838.5	0
839.5	0
840.5	0
841.5	0
842.5	0
843.5	0
844.5	0
845.5	0
846.5	0
847.5	0
848.5	0
849.5	0
850.5	0
851.5	0
852.5	0
853.5	0
854.5	0
855.5	0
856.5	0
857.5	0
858.5	0
859.5	0
860.5	0
861.5	0
862.5	0
863.5	0
864.5	0
865.5	0
866.5	0
867.5	0
868.5	0
869.5	0
870.5	0
871.5	0
872.5	0
873.5	0
874.5	0
875.5	0
876.5	0
877.5	0
878.5	0
879.5	0
880.5	0
881.5	0
882.5	0
883.5	0
884.5	0
885.5	0
886.5	0
887.5	0
888.5	0
889.5	0
890.5	0
891.5	0
892.5	0
893.5	0
894.5	0
895.5	0
896.5	0
897.5	0
898.5	0
899.5	0
900.5	0
901.5	0
902.5	0
903.5	0
904.5	0
905.5	0
906.5	0
907.5	0
908.5	0
909.5	0
910.5	0
911.5	0
912.5	0
913.5	0
914.5	0
915.5	0
916.5	0
917.5	0
918.5	0
919.5	0
920.5	0
921.5	0
922.5	0
923.5	0
924.5	0
925.5	0
926.5	0
927.5	0
928.5	0
929.5	0
930.5	0
931.5	0
932.5	0
933.5	0
934.5	0
935.5	0
936.5	0
937.5	0
938.5	0
939.5	0
940.5	0
941.5	0
942.5	0
943.5	0
944.5	0
945.5	0
946.5	0
947.5	0
948.5	0
949.5	0
950.5	0
951.5	0
952.5	0
953.5	0
954.5	0
955.5	0
956.5	0
957.5	0
958.5	0
959.5	0
960.5	0
961.5	0
962.5	0
963.5	0
964.5	0
965.5	0
966.5	0
967.5	0
968.5	0
969.5	0
970.5	0
971.5	0
972.5	0
973.5	0
974.5	0
975.5	0
976.5	0
977.5	0
978.5	0
979.5	0
980.5	0
981.5	0
982.5	0
983.5	0
984.5	0
985.5	0
986.5	0
987.5	0
988.5	0
989.5	0
990.5	0
991.5	0
992.5	0
993.5	0
994.5	0
995.5	0
996.5	0
997.5	0
998.5	0
999.5	0

## Sheet: Figure 2C
DPW	CTRL			aMSC-exos			pMSCs			pMSC-exos
0	113.097	115.359	110.835	113.097	115.359	110.835	113.097	115.359	110.835	113.097	115.359	110.835
7	81.713	77.6274	85.7987	72.3825	68.7633	76.0016	55.4178	52.6469	58.1887	70.211	66.7004	73.7215
14	55.4178	52.6469	58.1887	50.2656	47.7523	52.7789	3.1416	2.98452	3.29868	0	0	0
28	0	0	0	0	0	0	0	0	0	0	0	0

## Sheet: Figure 3B, D, E
Figure 3B	CTRL	AMSCs	pMSCs	pMSC-exos			Figure 3D	CTRL	AMSCs	pMSCs	pMSC-exos			Figure 3E	CTRL	AMSCs	pMSCs	pMSC-exos
	0	2	20	12				0	1	680	486				0	2	685	287
	0	4	23	11				0	1	543	573				0	1	743	365
	0	2	19	12				0	0	576	435				0	0	576	266

## Sheet: Figure 4B, D
Figure 4B	CTRL	aMSC-exos	pMSCs	pMSC-exos			Figure 4D	CTRL	aMSC-exos	pMSCs	pMSC-exos
	46.676	27.8731	12.2177	20.1835				26.5151	20.0564	1.24952	1.33726
	39.6746	28.6921	10.3851	15.806				29.1359	20.5785	1.39114	1.85186
	53.6774	32.054	14.0504	24.5611				23.2803	19.1307	1.21347	1.2698

## Sheet: Figure 5B
CTRL	aMSC-exos	pMSCs	pMSC-exos
27	48	92	149
24	55	114	120
33	42	134	111

## Sheet: Figure 6B, C
Figure 6B	CTRL	aMSC-exos	pMSCs	pMSC-exos				Figure 6C	CTRL	aMSC-exos	pMSCs	pMSC-exos				Figure 6D	CTRL	aMSC-exos	pMSCs	pMSC-exos
	247	168	52	39					0.880037	0.468679	0.181566	0.138953					1.03254	0.942761	0.899633	0.75366
	264	205	34	50					0.940606	0.571899	0.118716	0.178145					0.980914	0.895623	0.854651	0.715977
	331	222	44	31					1.17932	0.619325	0.153632	0.11045					1.08417	0.989899	0.944614	0.791344

## Sheet: Figure 7B-I
Figure 7B	CTRL	aMSC-exos	pMSCs	pMSC-exos			Figure 7C	CTRL	aMSC-exos	pMSCs	pMSC-exos			Figure 7D	CTRL	aMSC-exos	pMSCs	pMSC-exos
	0.750117	0.75869	0.907462	0.792524				0.976479	0.844207	0.687153	0.584736				0.664962	0.807776	1.06895	0.978853
	0.741111	0.720756	0.867089	0.787898				0.927655	0.801997	0.652796	0.655499				0.631714	0.767387	1.0155	0.92991
	0.719123	0.776625	0.847835	0.827151				1.0253	0.886417	0.721511	0.713973				0.69821	0.848165	1.12239	1.0278
Figure 7E	CTRL	aMSC-exos	pMSCs	pMSC-exos			Figure 7F	CTRL	aMSC-exos	pMSCs	pMSC-exos			Figure 7G	CTRL	aMSC-exos	pMSCs	pMSC-exos
	0.904418	0.921579	0.81029	0.8527				0.342995	0.309417	0.894843	0.63455				0.651763	0.759298	0.339837	0.399029
	0.889197	0.8555	0.806276	0.835065				0.325845	0.293946	0.8501	0.602822				0.619175	0.721333	0.322845	0.379078
	0.949638	0.927658	0.824305	0.800335				0.360145	0.324888	0.939585	0.666277				0.684351	0.797262	0.356829	0.418981
Figure 7H	CTRL	aMSC-exos	pMSCs	pMSC-exos			Figure 7I	CTRL	aMSC-exos	pMSCs	pMSC-exos			Figure 7J	CTRL	aMSC-exos	pMSCs	pMSC-exos
	0.802623	0.72107	0.526353	0.600359				0.619321	0.728128	1.07279	1.20862				0.908421	0.906585	0.551338	0.496164
	0.762492	0.685017	0.500035	0.570341				0.588355	0.691721	1.01915	1.14819				0.863	0.861256	0.508771	0.456356
	0.842754	0.757124	0.55267	0.630377				0.650287	0.764534	1.12643	1.26905				0.953842	0.951914	0.593905	0.535972
